# Supplementary material
Source: Research Square preprint supplement (doi:10.21203/rs.3.rs-9426058/v1)
Supplement: Supplementary file 1 [file b09cb6c89e21459ffad5dce5.pdf]

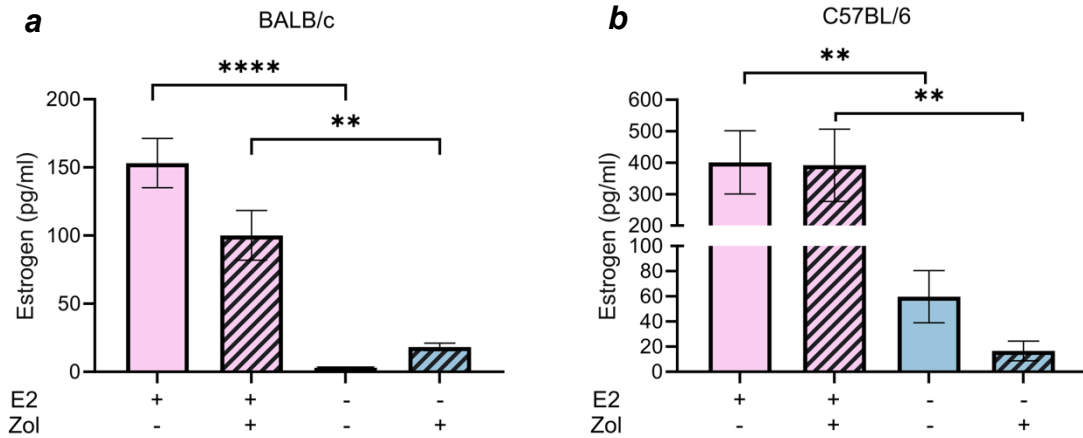

**Supplementary figure. 1: Effects of ovariectomy and Zol +/- E2 supplementation on serum E2 concentrations in BALB/c and C57BL/6 mice.**

12 - 14-week-old female C57BL/6 or BALB/c mice were ovariectomised and supplementing with 0 or 12.5mg/L 17 $\beta$ -estradiol (E2) via drinking water plus addition of 40ug/kg/day goserelin. Effects on serum concentration of E2 are shown for BALB/c and C57BL/6 mice in **a**) and **b**) respectively. Data shown are mean +/- SEM, by one way ANOVA and Tucky's post hoc test. \*P < 0.05; \*\*P < 0.01, \*\*\*\*P<0.001.

**a** Post-menopausal (Low E2) – G-MDSC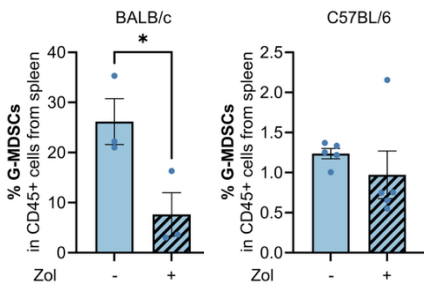**b** Post-menopausal (Low E2) - Macrophage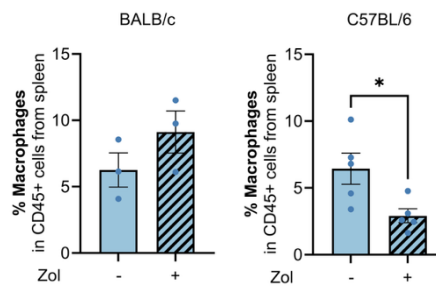**c** Post-menopausal (Low E2) - Monocyte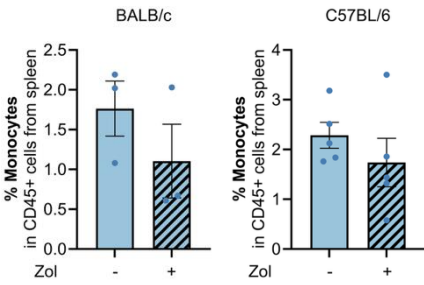**d** Post-menopausal (Low E2) - B cell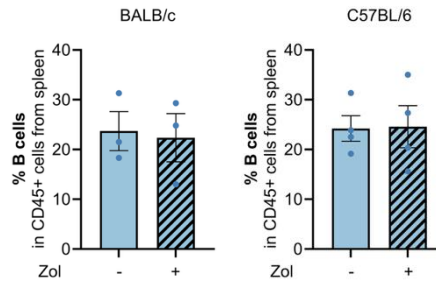**e** Pre-menopausal (High E2) – G-MDSC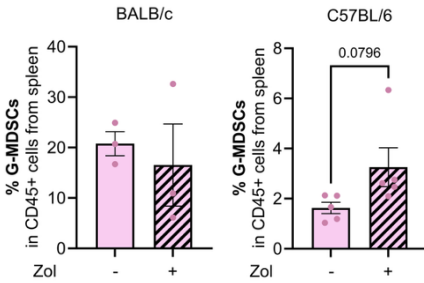**f** Pre-menopausal (High E2) - Macrophage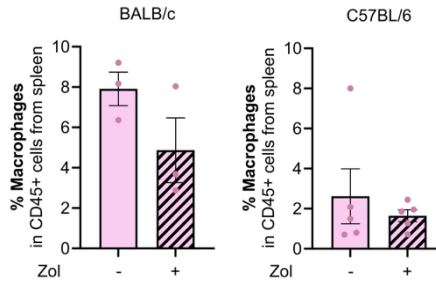**g** Pre-menopausal (High E2) - Monocyte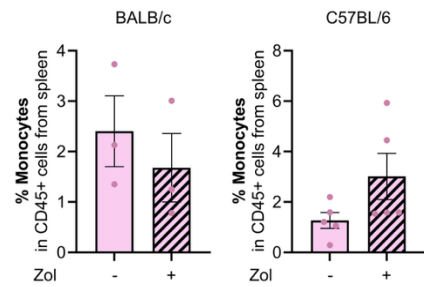**h** Pre-menopausal (High E2) – B cell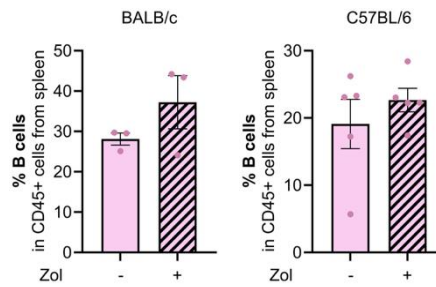

**Supplementary figure. 2: Effects of Zol +/- E2 on splenic macrophage, B cell, G-MDSC and monocyte populations in BALB/c and C57BL/6 mice.**

BALB/c and C57BL/6 mice were ovariectomized followed by administration of E2/diluent in the drinking water to produce serum E2 concentrations indicative of those found in pre- and postmenopausal women. 4T1-luc2 or E0771-luc2 cells were administered via intracardiac injection 7-days post ovariectomy and mice treated with either PBS control or 100 µg/kg/week Zol 3-days later. Spleens were dissected 9 and 11 days after injection of 4T1-luc2 or E0771-luc2 cells, respectively, and analyzed for relative quantities of immune cell populations. Effects of Zol on **a**) G-MCSC cells, **b**) macrophages, **c**) monocytes and **d**) B cells are shown for low E2 conditions (post-menopausal). Effects of Zol on **e**) G-MCSC, **f**) macrophage, **g**) monocyte and **h**) B cell populations are shown for high E2 conditions (pre-menopausal). Data are mean +/- SEM, t test. \*P < 0.05.

**a** Post-menopausal (Low E2) - **G-MDSC**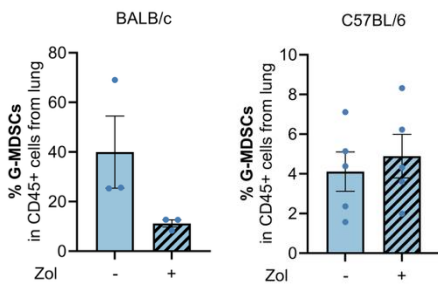**b** Post-menopausal (Low E2) - **Macrophage**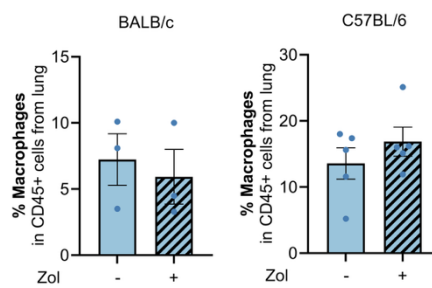**c** Post-menopausal (Low E2) - **Monocyte**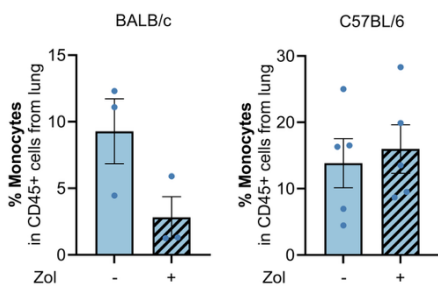**d** Post-menopausal (Low E2) - **B cell**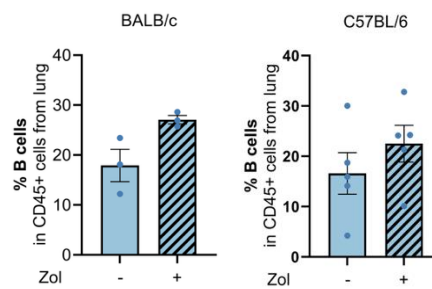**e** Pre-menopausal (High E2) - **G-MDSC**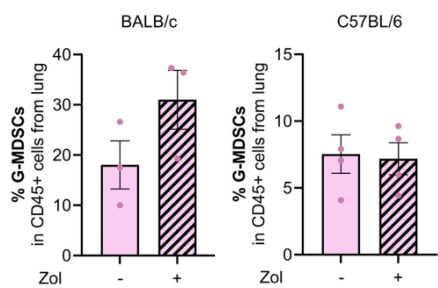**f** Pre-menopausal (High E2) - **Macrophage**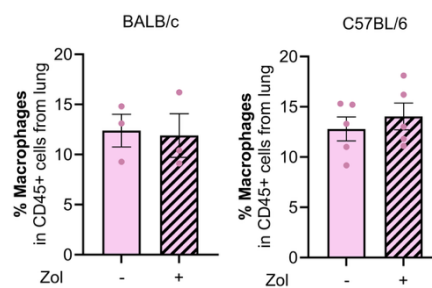**g** Pre-menopausal (High E2) - **Monocyte**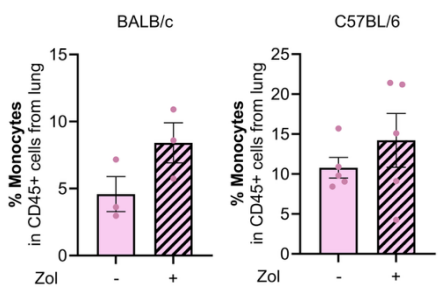**h** Pre-menopausal (High E2) - **B cell**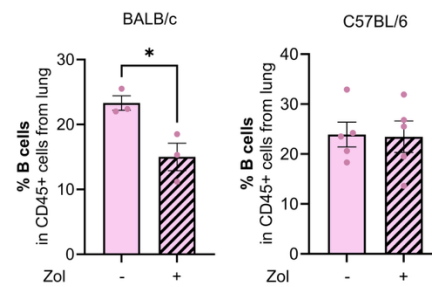

### Supplementary figure 3: Effects of Zol +/- E2 on macrophage, B cell, G-MDSC and monocyte populations in tumor bearing lungs from BALB/c and C57BL/6 mice.

BALB/c and C57BL/6 mice were ovariectomized followed by administration of E2/diluent to produce serum E2 concentrations indicative of those found in pre- and postmenopausal women. 4T1-luc2 or E0771-luc2 cells were administered via intracardiac injection 7-days post ovariectomy and mice treated with either PBS control or 100µg/kg/week Zol 3-days later. Tumor bearing lungs were dissected 9 and 11 days after injection of 4T1-luc2 or E0771-luc2 cells, respectively, and analyzed for relative quantities of immune cell populations. Effects of Zol on **a**) G-MCSC cells, **b**) macrophages, **c**) monocytes and **d**) B cells are shown for low E2 conditions (post-menopausal). Effects of Zol on **e**) G-MCSC cells, **f**) macrophages, **g**) monocytes and **h**) B cells are shown for high E2 conditions (pre-menopausal). Data are mean +/- SEM, t test. \*P < 0.05.

**a** Post-menopausal (Low E2) - NK cell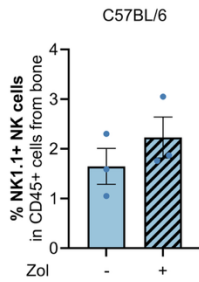**b** Post-menopausal (Low E2) - Dendritic cell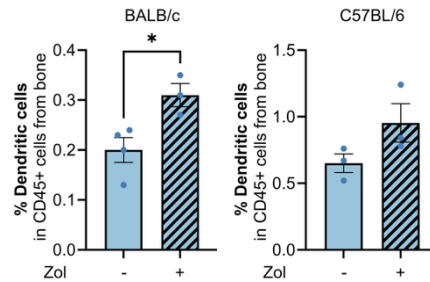**c** Post-menopausal (Low E2) - Monocyte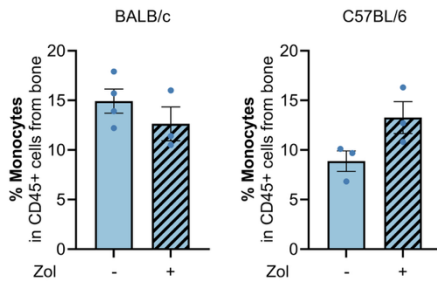**d** Post-menopausal (Low E2) - B cell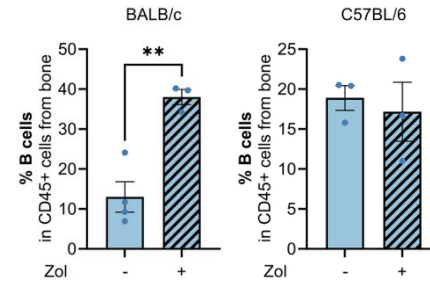**e** Pre-menopausal (High E2) - NK cell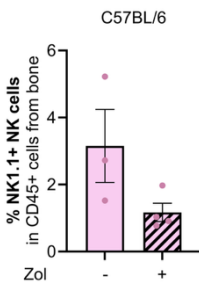**f** Pre-menopausal (High E2) - Dendritic cell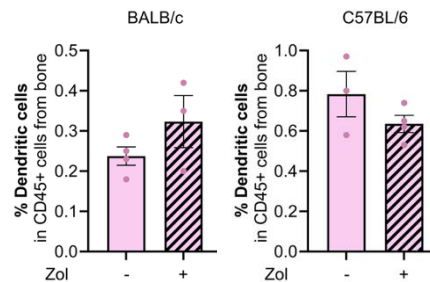**g** Pre-menopausal (High E2) - Monocyte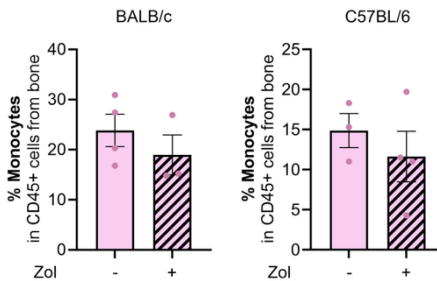**h** Pre-menopausal (High E2) - B cell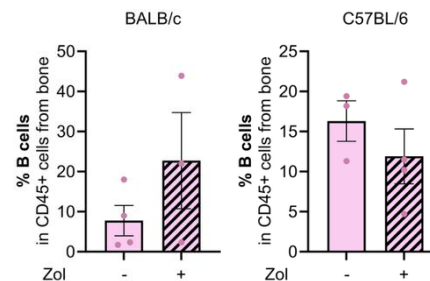

### Supplementary figure 4: Effects of Zol +/- E2 on macrophage, monocyte and B cell populations in tumor bearing bones from BALB/c and C57BL/6 mice.

BALB/c and C57BL/6 mice were ovariectomized followed by administration of E2/diluent to produce serum E2 concentrations indicative of those found in pre- and postmenopausal women. 4T1-luc2 or E0771-luc2 cells were administered via intracardiac injection 7-days post ovariectomy and mice treated with either PBS control or 100µg/kg/week Zol 3-days later. Tumor bearing bones were dissected 9 and 11 days after injection of 4T1-luc2 or E0771-luc2 cells, respectively, and analyzed for relative quantities of immune cell populations. Effects of Zol on **a**) NK, **b**) dendritic, **c**) monocyte and **d**) B cells are shown for low E2 conditions (post-menopausal). Effects of Zol on **e**) NK, **f**) dendritic, **g**) monocyte and **h**) B cells are shown for high E2 conditions (pre-menopausal). Data are mean +/- SEM, t test. \*P < 0.05, \*\*P < 0.01, \*\*\*P < 0.005.

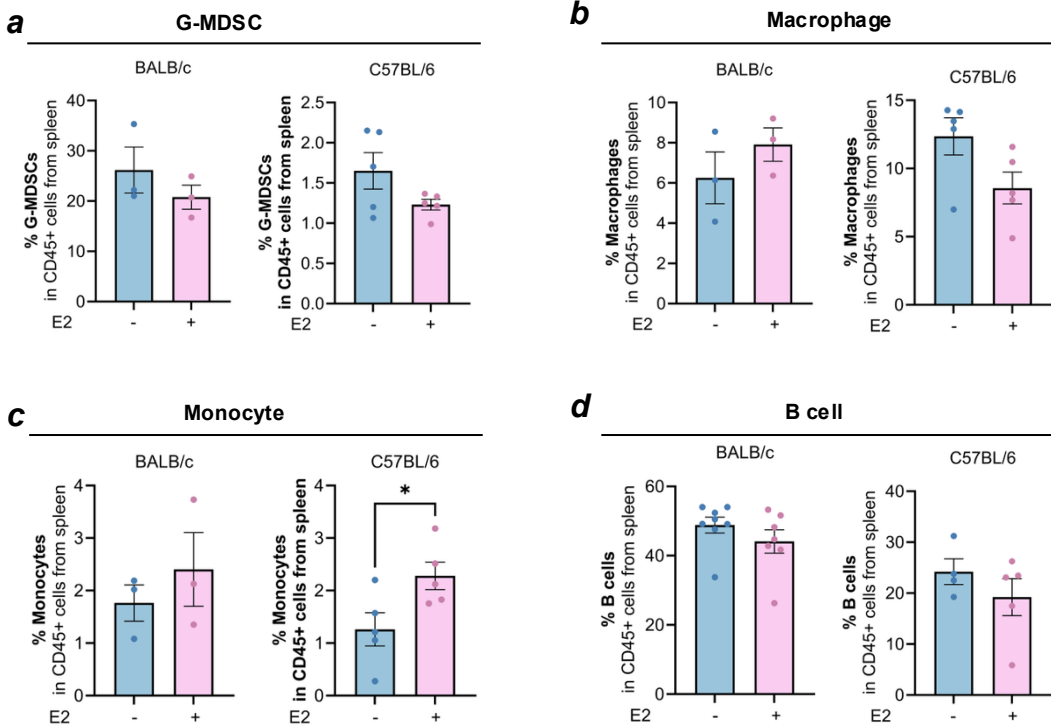

**Supplementary figure 5: Effects of Estrogen on systemic G-MDSC cells, macrophages monocytes and B cells.**

BALB/c and C57BL/6 mice were ovariectomized followed by administration of E2/diluent to produce serum E2 concentrations indicative of those found in pre- and postmenopausal women. 4T1-luc2 or E0771-luc2 cells were administered via intracardiac injection 7-days post ovariectomy. Effects of E2 on splenic **a)** G-MDSC cells, **b)** macrophages, **c)** monocytes and **d)** B cell populations are shown as mean +/- SEM.

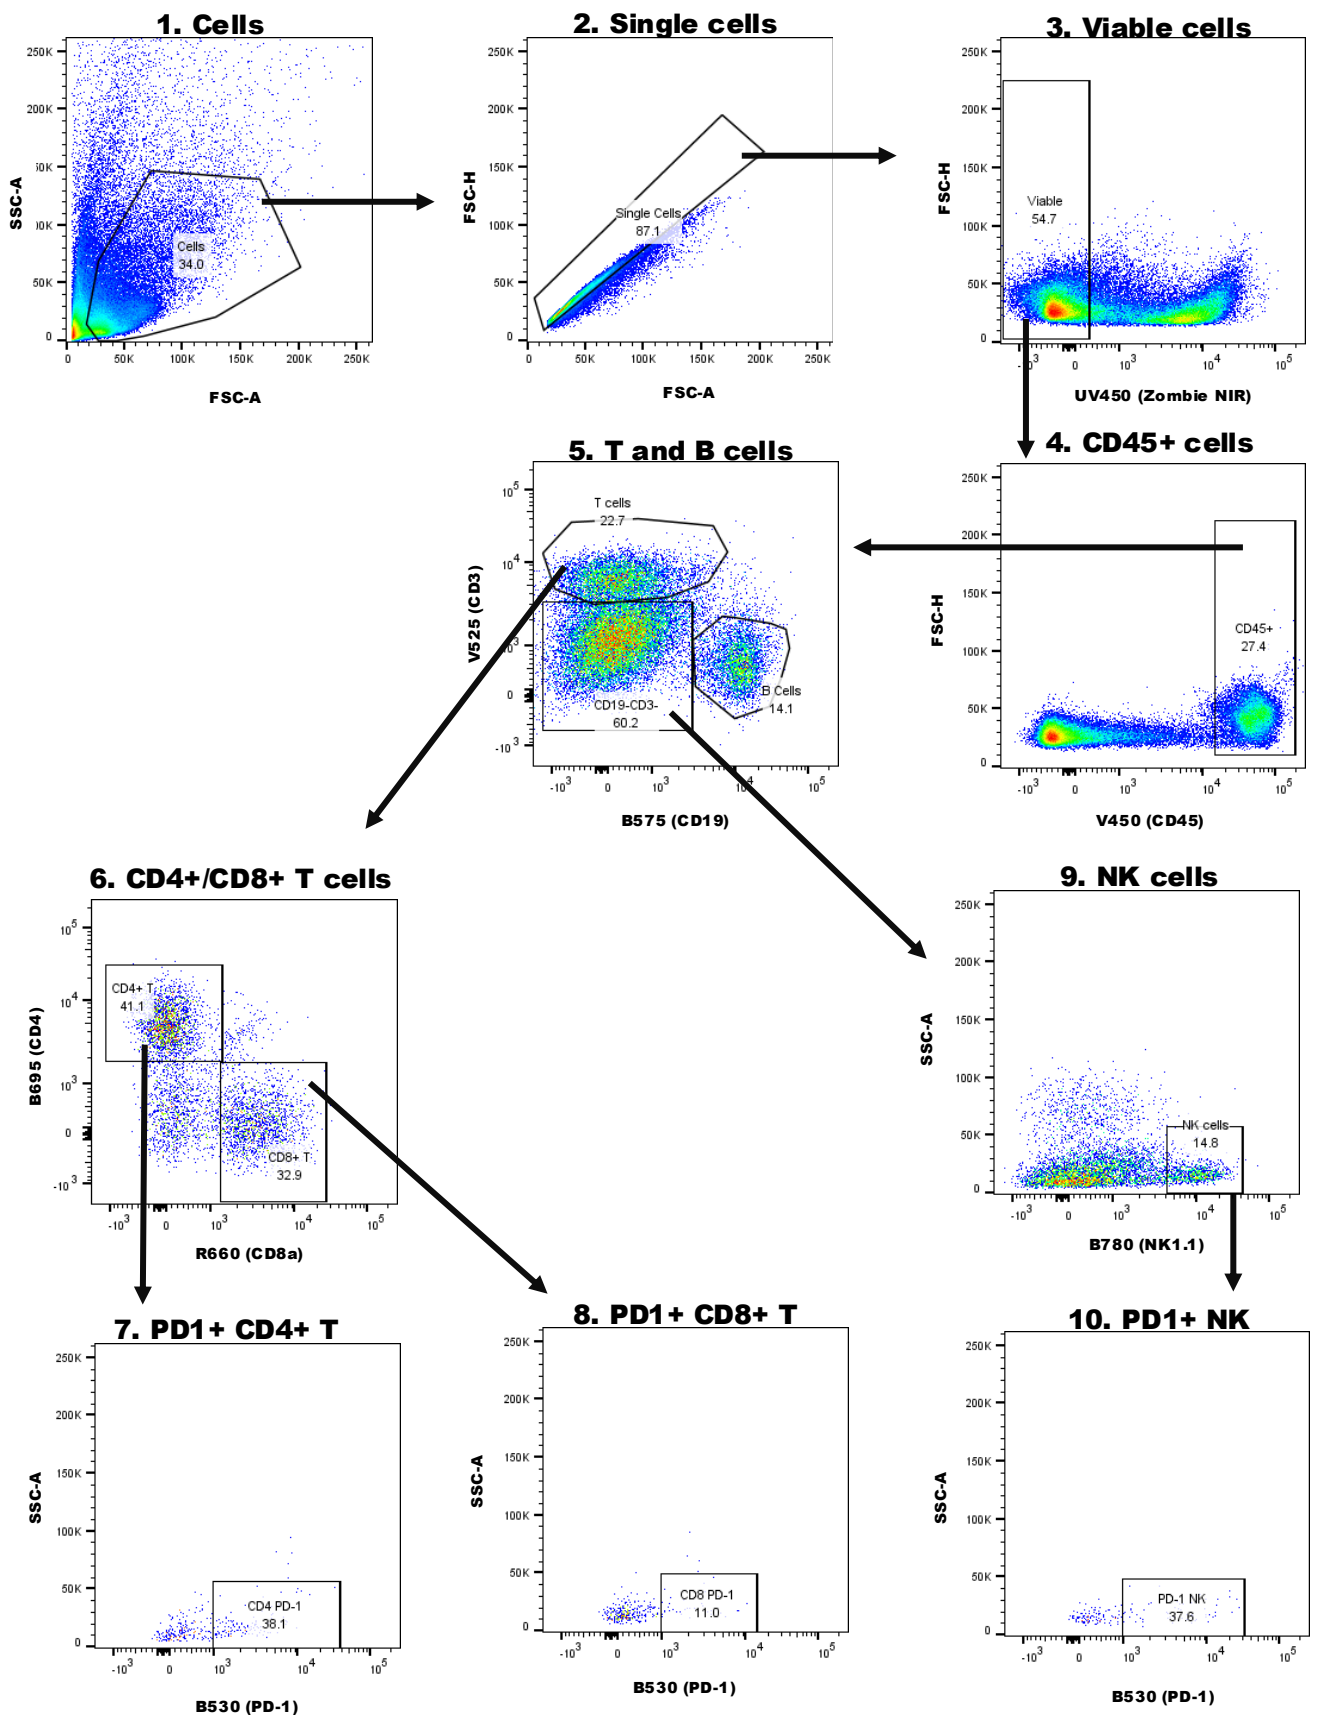

B cell: CD45+ CD3- CD19+  
 T cell :CD45+ CD3+ CD19-  
 CD4+ T cell :CD45+ CD3+ CD19- CD4+  
 CD8+ T cell :CD45+ CD3+ CD19- CD8+  
 NK cell :CD45+ CD3- CD19- NK1.1+

Supplementary figure. 6: Gating strategy for flow cytometric analysis of lymphoid cell populations using BD LSR II

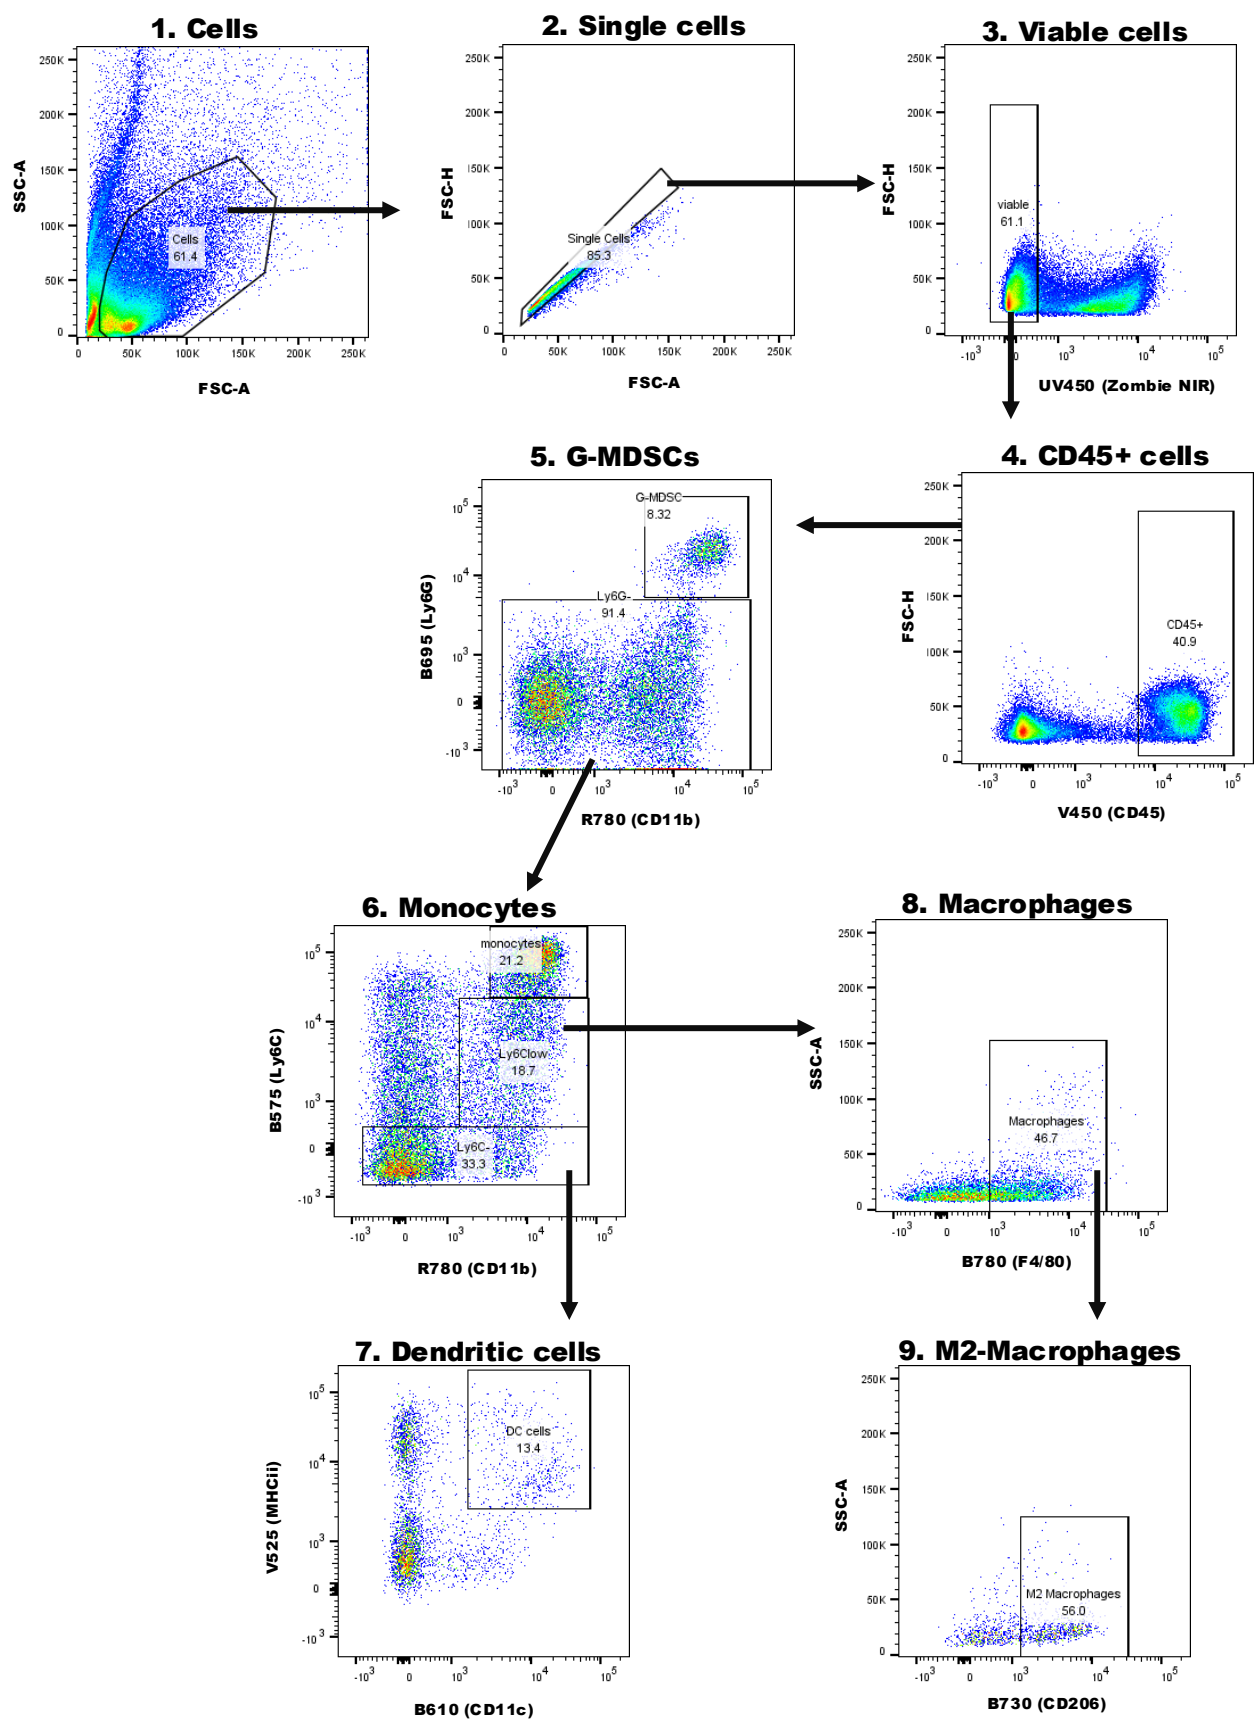

G-MDSC: CD45+ Ly6G+ CD11b+  
 Monocyte: CD45+ Ly6G- CD11b+ Ly6Chigh  
 Macrophage: CD45+ Ly6G- CD11b+ Ly6Clow F4/80+  
 Macrophage: CD45+ Ly6G- CD11b+ Ly6Clow F4/80+ CD206+  
 Dendritic cell: CD45+ Ly6G- Ly6C- MHC+ CD11c+

Supplementary figure 7: Gating strategy for flow cytometric analysis of myeloid cell populations using BD LSR II

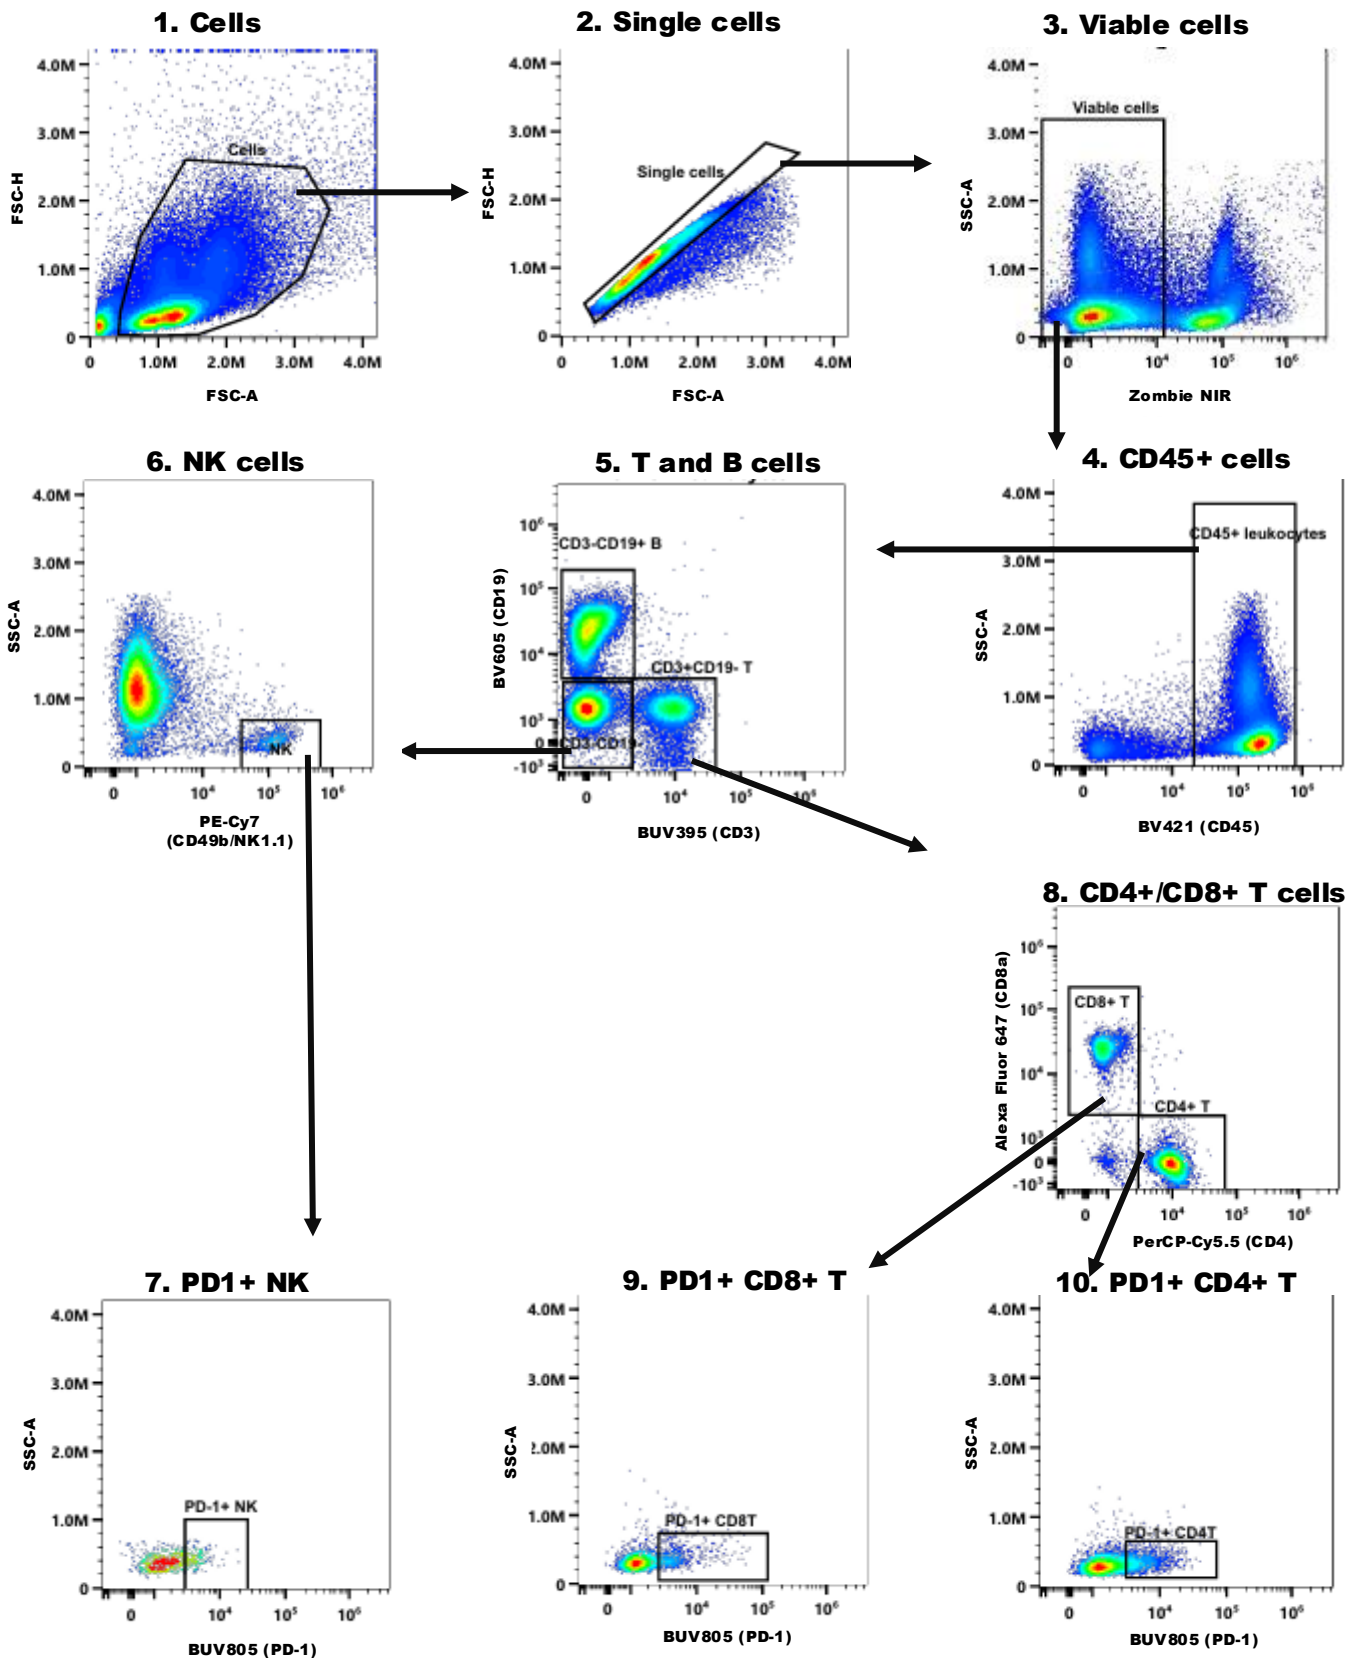

B cell: CD45+ CD3- CD19+  
 T cell :CD45+ CD3+ CD19-  
 CD4+ T cell :CD45+ CD3+ CD19- CD4+  
 CD8+ T cell :CD45+ CD3+ CD19- CD8+  
 NK cell :CD45+ CD3- CD19- NK1.1+/CD49b+

Supplementary figure. 8: Gating strategy for flow cytometric analysis of lymphoid cell populations using Cytex Aurora 5

### 1. Cells

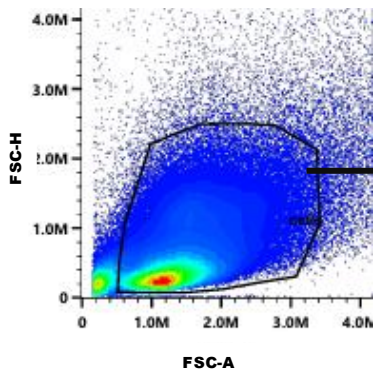

### 2. Single cells

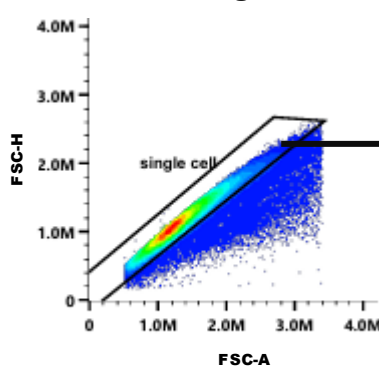

### 3. Viable cells

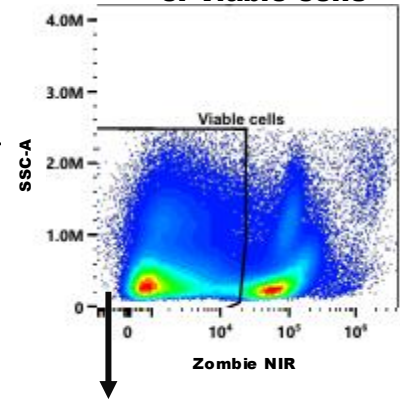

### 4. CD45+ cells

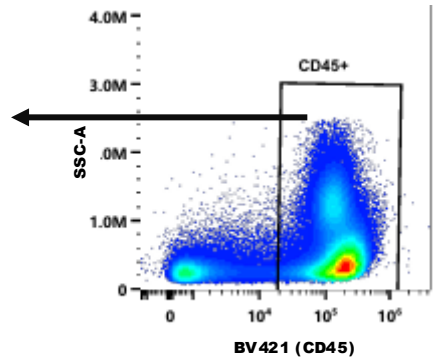

### 5. G-MDSCs

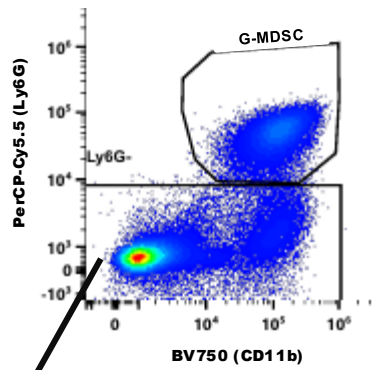

### 6. Monocytes

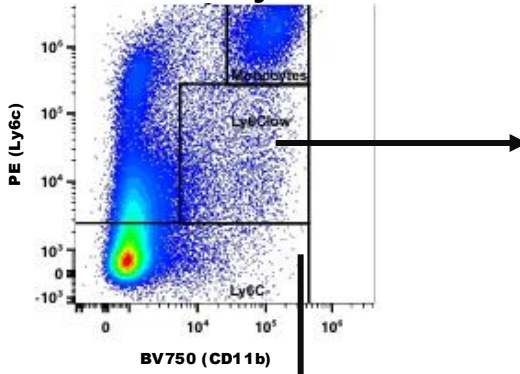

### 8. Macrophages

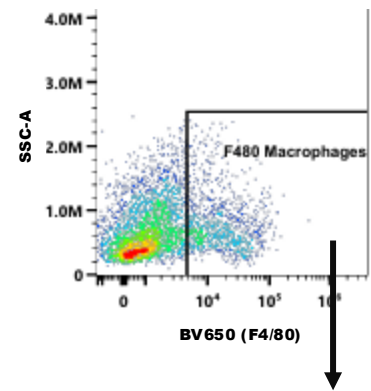

### 7. Dendritic cells

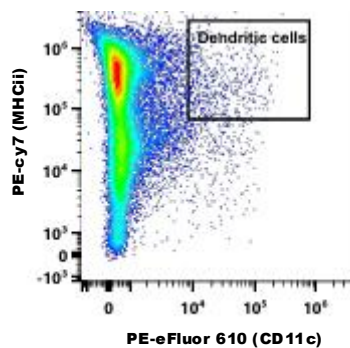

### 9. M2-Macrophages

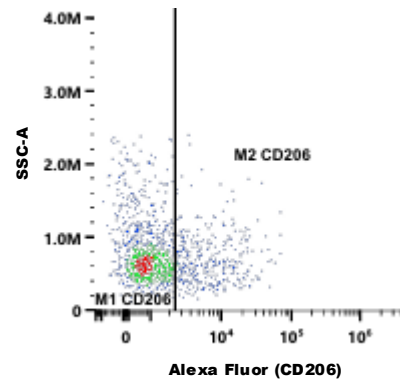

G-MDSC: CD45+ Ly6G+ CD11b+  
 Monocyte: CD45+ Ly6G- CD11b+ Ly6Chigh  
 Macrophage: CD45+ Ly6G- CD11b+ Ly6Clow F4/80+  
 Macrophage: CD45+ Ly6G- CD11b+ Ly6Clow F4/80+ CD206+  
 Dendritic cell: CD45+ Ly6G- Ly6C- MHCII+ CD11c+

| Target                | Fluorophore    | Species / Reactivity     | Isotype  | Clone        | Supplier   | #Cat       | Dilution | Filter |
|-----------------------|----------------|--------------------------|----------|--------------|------------|------------|----------|--------|
| <b>Lymphoid panel</b> |                |                          |          |              |            |            |          |        |
| <b>CD45</b>           | BV421          | Rat anti-Mouse           | IgG2b, κ | 30-F11       | BioLegend  | 103134     | 1:100    | V450   |
| <b>CD3</b>            | BV510          | Hamster anti-Mouse       | IgG      | 145-2C11     | BioLegend  | 100353     | 1:100    | V525   |
| <b>CD19</b>           | BV605          | Rat anti-Mouse           | IgG2a, κ | 6D5          | BioLegend  | 115540     | 1:100    | B575   |
| <b>CD4</b>            | PerCp-Cy5.5    | Rat anti-Mouse           | IgG2b, κ | GK1.5        | BioLegend  | 100434     | 1:100    | B695   |
| <b>NK1.1</b>          | PE-Cy7         | Mouse anti-Mouse         | IgG2a, κ | PK136        | BioLegend  | 108714     | 1:100    | B780   |
| <b>CD8a</b>           | AlexaFluor 647 | Rat anti-Mouse           | IgG2a, κ | 53-6.7       | BioLegend  | 100724     | 1:100    | R660   |
| <b>PD-1</b>           | FITC           | Rat anti Mouse           | IgG2a, κ | J43          | Invitrogen | 11-9985-82 | 1:100    | B530   |
| <b>Zombie</b>         | Zombie NIR     | Amine reactive dye       |          |              | BioLegend  | 423107     | 1:100    | UV450  |
| <b>Myeloid panel</b>  |                |                          |          |              |            |            |          |        |
| <b>CD45</b>           | BV421          | Rat anti-Mouse           | IgG2b, κ | 30-F11       | BioLegend  | 103134     | 1:100    | V450   |
| <b>F4/80</b>          | PeCy7          | Rat anti-Mouse           | IgG2a, κ | BM8          | BioLegend  | 123113     | 1:100    | B780   |
| <b>CD11b</b>          | BV750          | Rat anti-Mouse           | IgG2b, κ | M1/70        | BioLegend  | 101267     | 1:100    | R780   |
| <b>Ly6C</b>           | PE             | Rat anti-Mouse           | IgG2c, κ | HK1.4        | BioLegend  | 128008     | 1:100    | B575   |
| <b>Ly6G</b>           | PerCP-Cy5.5    | Rat anti-Mouse           | IgG2a, κ | 1A8          | BioLegend  | 127610     | 1:100    | B695   |
| <b>MHCII</b>          | PeCy7          | Rat anti-Mouse           | IgG2b, κ | M5/114.1 5.2 | BioLegend  | 107630     | 1:100    | V525   |
| <b>CD11c</b>          | PE-eFluor610   | Hamster anti-Mouse/Human | IgG      | N418         | Invitrogen | 61-0114-82 | 1:100    | B610   |
| <b>CD206</b>          | AlexaFluor 700 | Rat anti-Mouse           | IgG2a, κ | C068C2       | BioLegend  | 141734     | 1:100    | R730   |
| <b>Zombie</b>         | Zombie NIR     | Amine reactive dye       |          |              | BioLegend  | 423107     | 1:100    | UV450  |

**Supplementary table 1: Antibodies for analyzing of immune cell populations on the BD LSR II**

| Target                | Fluorophore    | Species/<br>Reactivity   | Isotype     | Clone           | Supplier   | #Cat       | Dilution | Filter |
|-----------------------|----------------|--------------------------|-------------|-----------------|------------|------------|----------|--------|
| <b>Lymphoid panel</b> |                |                          |             |                 |            |            |          |        |
| <b>CD45</b>           | BV421          | Rat anti-Mouse           | IgG2b,<br>κ | 30-F11          | BioLegend  | 103134     | 1:200    | V1     |
| <b>CD3</b>            | BUV395         | Hamster anti-Mouse       | IgG1, κ     | 145-2C11        | BDHorizon  | 563565     | 1:66     | UV2    |
| <b>CD19</b>           | BV605          | Rat anti-Mouse           | IgG2a,<br>κ | 6D5             | BioLegend  | 115540     | 1:100    | V9     |
| <b>CD25</b>           | PE             | Rat anti-Mouse           | IgG1, λ     | PC61            | BioLegend  | 102008     | 1:200    | YG1    |
| <b>CD4</b>            | PerCp-Cy5.5    | Rat anti-Mouse           | IgG2b,<br>κ | GK1.5           | BioLegend  | 100434     | 1:200    | B9     |
| <b>NK1.1</b>          | PE-Cy7         | Mouse anti-Mouse         | IgG2a,<br>κ | PK136           | BioLegend  | 108714     | 1:200    | YG9    |
| <b>CD49b</b>          | PE-Cy7         | Hamster anti-Mouse       | IgG         | HMa2            | BioLegend  | 103518     | 1:100    | YG9    |
| <b>CD8a</b>           | AlexaFluor 647 | Rat anti-Mouse           | IgG2a,<br>κ | 53-6.7          | BioLegend  | 100724     | 1:100    | R1     |
| <b>CD69</b>           | AlexaFluor 488 | Hamster anti-Mouse       | IgG         | H1.2F3          | BioLegend  | 104516     | 1:100    | B2     |
| <b>PD-1</b>           | BUV805         | Rat anti-Mouse           | IgG2a,<br>κ | 29F.1A12        | BDHorizon  | 568609     | 1:100    | UV16   |
| <b>Zombie</b>         | Zombie NIR     | Amine reactive dye       |             |                 | BioLegend  | 423107     | 1:500    | R5     |
| <b>Myeloid panel</b>  |                |                          |             |                 |            |            |          |        |
| <b>CD45</b>           | BV421          | Rat anti-Mouse           | IgG2b,<br>κ | 30-F11          | BioLegend  | 103134     | 1:200    | V1     |
| <b>F4/80</b>          | BV650          | Rat anti-Mouse           | IgG2a,<br>κ | BM8             | BioLegend  | 123149     | 1:66     | V11    |
| <b>CD11b</b>          | BV750          | Rat anti-Mouse           | IgG2b,<br>κ | M1/70           | BioLegend  | 101267     | 1:100    | V14    |
| <b>Ly6C</b>           | PE             | Rat anti-Mouse           | IgG2c, κ    | HK1.4           | BioLegend  | 128008     | 1:200    | YG1    |
| <b>Ly6G</b>           | PerCP-Cy5.5    | Rat anti-Mouse           | IgG2a,<br>κ | 1A8             | BioLegend  | 127610     | 1:100    | B9     |
| <b>MHCII</b>          | PeCy7          | Rat anti-Mouse           | IgG2b,<br>κ | M5/114.1<br>5.2 | BioLegend  | 107630     | 1:100    | YG9    |
| <b>CD11c</b>          | PE-eFluor610   | Hamster anti-Mouse/Human | IgG         | N418            | Invitrogen | 61-0114-82 | 1:66     | YG2    |
| <b>CD163</b>          | APC            | Rat anti Mouse           | IgG2a,<br>κ | S150491         | BioLegend  | 155306     | 1:200    | R1     |
| <b>CD206</b>          | AlexaFluor 700 | Rat anti Mouse           | IgG2a,<br>κ | C068C2          | BioLegend  | 141734     | 1:100    | R4     |
| <b>Zombie</b>         | Zombie NIR     | Amine reactive dye       |             |                 | BioLegend  | 423107     | 1:500    | R7     |

**Supplementary table 2: Antibodies for analyzing of immune cell populations on the Cytex Aurora 5**
